# Supplementary material for: Measurement Characteristics of an airborne Microwave Temperature Profiler (MTP)
Source: Copernicus journal article supplement (doi:10.5194/amt-2019-455), 2020-01-08
Supplement: Supplementary file [file amt-2019-455-AC1-supplement.pdf]

## Measurement Characteristics of an airborne Microwave Temperature Profiler (MTP)

by Mareike Kenntner et al.

Reply to the referee #1 comments

We would like to thank the referee for thoroughly reviewing our manuscript and for the helpful advice provided in the comments, below, which we believe helped improving the manuscript. In the following we give our answers regarding the points made by the reviewer. The statements, comments and suggested corrections raised by the referees are printed in black italics and our comments are presented in blue. We tried to consider all of the raised points in the revised manuscript in an adequate manner.

Answers to referee #1

*General Comments:*

*1. The implications of the instrument characterisation for the subsequent interpretation of TB and temperature retrieval are not thoroughly assessed. Section 5 should have a clear outcome on the questions: (i) spectral characteristics: Which are the representative frequencies of the three channels? Which frequencies shall be assumed for the retrieval algorithm? Does the RT have to consider the full bandpass characteristics? (ii) Which is the effect of the antenna bandwidth? Is a pencil beam approach justified? (III) What noise characteristics have to be assumed in the retrieval, e.g. in the measurement covariance matrix?*

This is a very thorough list of characteristics to be assessed for a retrieval algorithm. Currently, there exists more than one approach to retrieve the absolute temperature profiles from MTP brightness temperatures, which is one of the reasons why the authors decided to not consider retrieval algorithms in the study.

The intention of Section 5 was to point out that a different approach to decide which measurement strategy (i.e. number of viewing angles and LO frequencies) could be used. A thorough study of all implications for a retrieval algorithm would be beyond the scope of this study. For that reason and on advice of the reviewer, Section 5 has now been moved to an appendix. The usefulness of an assessment of the questions asked above, as well as to investigate the impact of changes in the measurement strategy are understood, and should be attempted in an upcoming study.

*2. Accurate calibration is the most important task in microwave radiometry. As all components are strongly temperature dependent besides temperature stabilisation a periodic calibration is needed. The calibration might only update the gain of the system (relative calibration) or make an absolute calibration in which all parameters of the raw measurement (count) to TB model are derived. In the simple linear case (as it is used in this manuscript) these are gain and receiver noise temperature  $T_r$  which can be derived by pointing the antenna successively to two reference targets. The authors seem to be not aware of this classical microwave formalism which is also apparent as they hardly cite any literature microwave radiometry (list in the back) and some flaws in the radiometer formula application. The major questions which would need to be addressed are: How good are the reference targets (blackbodies)? How frequently does a calibration need to be made? Why have the measurements in the cold chamber with view on a stable target not been used for such an analysis? The next step would then be the in flight calibration. Assuming that the laboratory*

*calibration (strategy 1) would work is a bit naïve. However, there are good approaches later on using the horizontally pointing measurements but a motivation and explanation why this procedure was chosen needs to come first.*

We think it is not necessary to explain the standard method of radiometer calibration, here. The presented assessment of calibration methods is based on using this calibration method, since it was used throughout the measurement series inside the cold chamber, and the derived calibration parameters are used to characterise various parts of the instrument, and calibration methods used in flight. As pointed out within the manuscript, the instrument only has one single built-in calibration target, which can be used during flight, and the study provides a guideline, how this can be used to derive the brightness temperatures from the measurements taken during flight.

As for the specific questions asked by the reviewer, we have added specific information about the microwave absorber used in the laboratory calibration, as well as some information from the instrument documentation.

Concerning an analysis of the necessary frequency of calibration, please see our comment on the specific comment about an assessment using the Allan Variance, below. In general, the deployment of the MTP instrument, which is mounted completely outside of the aircraft, requires permanent monitoring of the instrument state, which is already implemented in the way the measurements are taken: Calibration measurements are made after each measurement cycle (i.e. after taking measurements at each elevation angle), approx. every 13-14 seconds. This is the highest possible frequency with which calibration measurements can be taken during flight.

Finally, while the proposed strategy no. 1 for in-flight calibration might sound naïve, we have included this approach in our discussion for reasons of completeness. The results show that using this method in the cold-chamber provides the possibility to link in-flight instrument conditions to measurements within the cold-chamber, and derive calibration parameters, that lead to comparable results as other calibration methods.

In the revised manuscript we therefore have included a brief discussion of the pros and cons of using each of the calibration strategies when introducing them.

*3. The information on the MTP measurement principle is not clearly provided in the beginning of the manuscript making it difficult for the reader to follow. Bits and pieces come together at different instances, e.g. scanning is explained on page 14 and especially the discussion on the use of different oxygen lines is confusing. For better understanding the authors should include a thorough description of the MTP measurement principle in the beginning and add an absorption spectrum (preferably even for different pressure levels as in Fig. 16) to illustrate the frequency channels (and their potential tuning range). This also serves to introduce the double sideband principle. Further, it could be explained why the LO is typically set at center frequency for mitigating problems due to frequency drifts, and how non-resonant emission (water vapor continuum, hydrometeors) affects the measurement. This would also demonstrate that the LO frequency is not the frequency for which the measured TB is representative (passband averaged – see Fig. 16).*

The revised manuscript now contains more information on how the measurement set-up works, and links to the already existing literature, in which the standard settings for this instrument are already introduced and discussed (i.e. Mahoney and Denning, 2009, and Lim et al., 2013). We have updated Table 1 to include all relevant information.

The measurement principle is explained in more detail in the revised version.

4. Section 5 address future measurement strategies in terms of frequency selection and elevation scanning. This is an important study but is not done as thoroughly as it is needed especially in light of vertical resolution of the retrieved temperature profiles for different types of atmosphere. It also does not take into account the findings of their laboratory measurements in respect to the spectral and spatial sensitivities. As the paper is already very lengthy it should be taken out.

We agree that more could be done to thoroughly assess all input parameters needed in a retrieval. We are aware that those input parameters may depend on the type of retrieval used (optimal estimation, neuronal network, Tikhonov retrieval,...), and the Section was intended to indicate potential for possible improvements in the general measurement strategy. While we do think that this consideration is worthy to be noted by users of the MTP data, and other groups using MTP instruments, we agree, that it might better fit as an appendix.

5. At several instances it seems that the authors have gravity wave detection as application in their mind – this is ok but needs to be clearly stated (only abstract). Many readers might not know which requirements in TB are needed for this purpose. Other users might be more interested in vertical resolution for stability assessment.

Indeed, the study was first undertaken with the goal of assessing temperature fluctuations for gravity wave studies. As the short overview of already published studies using MTP data shows, there are other interests in using this kind of data, as well. We have changed the text in the abstract and introduction accordingly.

6. The readability of the paper needs to be improved - sometimes it is more a technical report than a paper. No clear goals are provided, the structure is not always clear, the text is written rather lengthy and many basic informations only appear rather late in a middle of a section where you would not expect it. Short paragraphs sometimes even only one sentence long occur and the text frequently repeats (unnecessarily) the figure captions, e.g. "Plotted is also a..". The paper could be shortened by reducing number of figures or using an appendix. I would recommend to concentrate only on the past measurements. The optimized scanning strategy In case but the future – which I think would be an own study if done carefully could go in an appendix.

As noted above, we agree, that section 5 fits better as an appendix to the study, and have changed the manuscript accordingly. The wording of the manuscript has been checked, and where necessary, revised.

Figure 8 in the revised version now contains Figures 8 and 10 of the submitted version, and Figure 10 of the revised manuscript now contains both Figures 11 and 12 of the submitted version.

*Specific Comments: Why are brightness temperatures referred to as BT in the text (and Fig. 11) and TB in the equations. Historically the satellite community uses BT and the ground-based community TB. I don't think it matters which one is chosen but it should be consistent.*

All instances of "BT" in the text have been changed to "TB" for consistency.

*P118: "records radiances", no it records counts which are calibrated to brightness temperatures - it is ok to say TB here*

Indeed, the recorded signal is in counts. Since the physical quantity that is measured is radiance, the sentence is changed to: “The Microwave Temperature Profiler (MTP), an airborne passive microwave radiometer, measures radiances, recorded as counts and calibrated to brightness temperatures, in order to estimate temperature profiles around flight altitude.”

*P119: “state of the atmosphere can be derived” this indicates much more information than the temperature profile which was stated already – what else?*

The (dynamical) state of the atmosphere can be derived from the temperature profile; The sentence is extended to: “From these data quantities such as potential temperature gradients and static stability, indicating the state of the atmosphere, can be derived and used to assess important dynamical processes (e.g. gravity waves or stability assessments).”

*P1122: “weaker oxygen lines” better write ‘frequency channel’. The LO frequency of the channel does not necessarily need to be at a line center. Also and it seems to me that it is not clear to authors: the LO frequency is not the representative frequency of the channel – and the “representative frequency” can be extracted from their laboratory measurements. I anyway suggest to modify section 5 such that it can provide the necessary input for the retrieval algorithm*

In the case of the MTP, the LO frequency really is placed at the line centre, which is stated in section 2.2. The discussion of the “representative frequency relates to the radiative transfer calculation, which is part of the retrieval algorithm. The transmission function was measured for the MTP, and should be used when setting up the retrieval calculations. In section 5, a simplified approach was chosen, to show that some easy-to-be-made changes to the measurement set-up can already have a large influence on the quality of retrieval input. Since this section will be shifted to the appendix, we will not attempt to make additions, as a thorough investigation of implications for radiative calculations may well fill its own study.

*P1122: “calibration parameters do clearly depend on the state of the instrument”. This is the key in microwave radiometry for astronomy, atmospheric, planetary science etc. ever since and for all instruments there is the question how frequently one has to calibrate, e.g. Dicke switching for short-term fluctuations. Unfortunately, even slight vibrations and temperature changes can cause transmission characteristics to change thus calibration parameters. So this sounds a bit naive – I recommend the authors to look more in basic microwave radiometry books, e.g. Janssen, 1994, Vowinkel, 2013, Woodhouse, 2017,*

We agree that this problem is not unique to the MTP. Microwave instruments always have this issue, and the literature states many examples and approaches used to stabilize the systems in operation. Since the MTP is mounted completely outside an aircraft, which frequently changes flight altitude and/or speed, and enters different temperature and wind conditions, such stabilization is not readily possible. Moreover, changing the instrument design in an attempt to increase instrument stability would be very costly, and the limited space inside the wing canister does not allow for many options in hardware changes anyway. This increases the problem for the MTP, as compared to, e.g., ground-based instruments. We have changed the sentence to show these circumstances: “The MTP shows quite large changes of the instrument state, imposing considerable changes in calibration parameters over the course of a single measurement flight”

*P1I26: Here it should be said that precision is determined for TB which closely relates to the atmospheric temperature when the instrument is pointed horizontally – otherwise it is confusing*

We have made the suggested change.

*P2I16. What is meant by structures?*

Basically it is meant that any signal in the timeline of measurements, that deviates from a smooth background could be caused by either noise created by the instrument itself, or has its cause in some real, physical process in the atmosphere, in which case we would like to be able to detect it with this instrument.

The word “structures” was replaced by “fluctuations”.

*P3I9-12 and P3I14: There is a very long list of applications of past studies using older versions of the MTP (is that really necessary?) and then it is claimed that instrument characteristics need to be known for correct interpretation. This is true and that’s why this study is valid but it somehow implies that the work here also helps with data from old campaigns. This needs to be clarified.*

It was not the authors’ intention to claim that this study helps interpreting measurements from older MTP instruments. Listing the previous usage of MTP data from the past was intended to show that data from MTP instruments developed by JPL is frequently used and that this study is of interest to a wider community of researchers.

The paragraph has been reworded so that there is no impression given that older studies may not be valid due to the herein presented findings. In the manuscript we only state that thorough characterisations of older MTP instruments have not been published before. We are clearly not implying that those characteristics were always completely unknown!

*Introduction: the whole introduction is dedicated to the MTP but there is no reference to other studies on the characterisation of other microwave airborne instruments is made, e.g. Blackwell et al, 2001 describing NAST with frequencies 50-57 GHz, McGrawth and Hewison, 2001, Wang et al, 2007 etc. which might also check different instrumental parameters. The introduction clearly needs to mention the goals of the lab investigations.*

The studies mentioned by the reviewer provide a variety of instrument characteristics, many of which were also referred to here. Other characteristics measured, e.g. in McGrawth and Hewison were not an option for the DLR.MTP, as a disassembly of the instrument hardware was not possible without losing aircraft certification. This is now stated in the introduction and in the appropriate sections, in connection with a reference, where fitting.

*P4I2: Not all radiometers for temperature profiling measure at the oxygen absorption complex around 60 GHz - also 118 GHz is used. In general, it is surprising that no reference is made to the fact that operational meteorological satellite instruments, e.g. AMSU-A, do temperature sounding since decades. These sounders exploit only the frequency information for profiling while the MTP aims at improving the resolution by angular information. It is necessary to explain the measurement principle here thoroughly, showing a spectrum (ideally for different altitudes) and the considered frequency channels. On a side note: The accuracy of the oxygen spectroscopy is still under debate which is, however, more important for retrievals, Cadeddu et al, 2007; Cimini et al, 2018, Maschwitz et al 2013.*

It is true, that this study places its focus on the MTP instrument itself. We have changed the wording to acknowledge the fact that temperature measurements are also possible at 118 GHz. The comment on using the angular information to improve the vertical resolution is very valuable, and we changed the text in Section 2.1 accordingly.

The development of the MTP instrument has not been done by the authors of this study. Since the instrument has a long history, there are a number of publications available, explaining the measurement principle (e.g. Denning, et al. 1989), as well as some unique features and considerations related to the wing-canister design (e.g. Lim et al. 2013), including consideration of the used frequencies. We have given those references in the description of the MTP instrument (Section 2.2) and added a few sentences to briefly introduce the measurement principle.

Concerning the very interesting ongoing debate of the accuracy of oxygen spectroscopy, we agree that this topic relates more to retrievals, which has been explicitly excluded from this study.

*P4I2: Why don't you explain the heterodyne principle and talk about a double side band receiver. This is very important to clearly define the frequencies for the radiative transfer used for retrieval development.*

The important information that the DLR-MTP uses a double-sideband heterodyne receiver is added in the text, and the measurement principle is briefly explained in section 2 of the revised manuscript.

*P4I18: "making the retrieval of temperature profiles possible" Most instruments only use information on frequency dependence. Make clear that the MTP can achieve higher vertical resolution by adding the angular information.*

We agree, that it is valuable to pointing out a clear advantage of the MTP instrument in comparison to other microwave systems. We have revised the text, making this point clearer (also according to the comment referring to p4I2).

*P4I24: Thermal stabilisation is the most important part in a microwave radiometer the performance of all microwave components strongly depends on temperature. Therefore more details on that are needed.*

Details on the temperature control are given in Mahoney and Denning, 2009, to which we refer at the beginning of the Section. According to this publication the "[t]emperature control at the point where the thermistor is mounted is approximately  $\pm 0.1\text{C}$ ".

There is no possibility to monitor the real temperatures of the components during flight, other than through the housekeeping data, recorded during flight. Here, we do see changes depending on flight levels (surrounding temperatures), and temperature gradients across the instrument are visible. However, since the thermistors are only placed at certain positions, there remains the question, if the temperature recorded in the MTP housekeeping data is representative for the critical components, and how changes are to be interpreted.

We do acknowledge that a new series of cold-chamber laboratory measurements to investigate the overall temperature behaviour of MTP components could be an interesting

study in the future, but such measurements cannot be performed in the near future to be included in this study.

*P4I229: What about temperature stability, homogeneity, spill over of the target, cf. Mc Grawth and Hewison (2001).*

While we were not able to perform all of the characterisations described in the study published by McGrawth and Hewison, most tests were also performed in our laboratory set-up.

The main reason for leaving out some of the tests, e.g. determining the spill-over, is due to the fact, that the DLR-MTP is certified to be flown on a research aircraft. Disassembling the instrument would lead to a costly process of re-certification, which prevented us from taking any parts out of the instrument. Hence, a spill-over measurement for the antenna was not possible. For the same reason, we do not have the means to add any observation system to the instrument while mounted on the aircraft, to, e.g. monitor the thermal stability during flight, or the characteristic temperature of the heated target.

The temperature stability of the target is part of the investigation presented in Section 4. The housekeeping data only state the thermistor temperature in the back of the target, other measurements are not available. Testing the representative brightness temperature of the hot target in the cold-chamber is the nearest we can get to such an assessment. There is no possibility to conduct an assessment comparable to that shown in McGrath and Hweison, 2001, since we cannot change or add parts to the hardware of the instrument, without a costly revision of the permit-to-fly.

*P5, I14-15: the discussion on the oxygen spectrum and LO needs further explanation and should come before not in the section on wing-canister, same for the information on the frequency range (I25) below.*

The Section is structured in a way to introduce the basic principle of Microwave radiometry, moving from the broad principle to more and more specific details.

As mentioned in a previous answer, the discussion of the Oxygen spectrum and choice of LO is already presented in Mahoney and Denning, 2009, and also briefly discussed on Lim et al., 2013. We have added a sentence to the text, which points out that the original choice of standards LO frequencies was made by the inventors of the instrument.

*P5I22: how large is the gap, x MHz?*

The gap is nominally 20 MHz wide, which is confirmed by the measurement of the filter function (Figure 2, left panel). We have added this information in the text, as well as a reference to Figure 2.

*P6I 6 "investigation OF calibration"*

We have corrected this typo.

*Section 3. The frequency response of the bandpass is investigated but there is no discussion on the stability of the LO frequency – does this have any potential effect on measured TB?*

A measurement of LO frequency stability would require disassembling part of the instrument, to attach the measurement equipment (oscillator) to the frequency synthesizer output. We did not attempt such measurements, which required disassembling the instrument, as this would have had serious implications for continued airworthiness.

Some thoughts on the potential influence of measured brightness temperature, influenced by synthesizer errors: Potentially the largest influence is that with a shift of the LO frequency, the gap in the middle of the filter function is no longer located at the center of the strong oxygen absorption line. Hence, on one side of the filter function, much larger absorption very close to the aircraft would be included in the signal, while on the other side, the signal is caused by absorption slightly further away from the aircraft. Since the LOs are placed at very strong absorption lines, the first effect probably outweighs the second effect, so that the measured brightness temperature would be representative of an altitude layer closer to the aircraft, than assumed. The absolute error depends on the aircraft altitude and the temperature gradient present in the atmosphere surrounding the aircraft. Largest errors would certainly be induced at lower pressure, where the line shape is sharper. Also, larger temperature gradients in the atmosphere would induce a larger error in the measured brightness temperature. The absolute effect of frequency shifts in the LO would have to be modelled, using radiative transfer calculations. However, we feel that the large gain fluctuations seen in the calibration of campaign data can be assumed to be much larger than the induced error by small LO frequency shifts.

Following the comment from Reviewer 2, that the pointing error seems misplaced in the Section on brightness temperature calibration, we have added a new Section to discuss further sources of measurement uncertainty, in which the pointing error is included, as well as some discussion of other error sources, such as synthesizer errors, reflecting the discussion above.

*P6I27: The authors mention the periodicity of the signal first. I understand that for gravity wave detection this is important but in terms of radiometer performance the most important question is whether the instrument follows the radiometer formulae (Eq. 4.8), i.e. noise reduces with increasing integration time. For this purpose typically the Allan variance is used. This characterizes the noise and determines how long measurements can be integrated in time and how frequently a calibration needs to be performed.*

We indeed measured time series of the Tb in the cold chamber. It was found out that up to averaging times of > 20 s the noise behaviour resembles white noise. The precision of the measurement could thus be improved by longer averaging times, however, the spatial resolution due to the high aircraft speed clearly calls for reducing the measurement cycle to short integration times.

A brief discussion of those points is added in the revised manuscript.

*Section 3.1: The name is irritating as it could mean much more. The measurements of the bandpass characteristics and the antenna diagram (section 3.1) are important and interesting but are presented rather briefly without any implications for the subsequent retrieval. Even the exact measured bandwidth and beamwidth are not given. For the analysis or implications RT calculation would play a major role. As for example shown in Crewell et al. (2012, their figure 10) the bandpass characteristics can cause the effectively measured TB being representative for a frequency deviating significantly from the specified channel frequency. In fact in the double side band approach this anyway takes place and needs to be handled in the RT underlying the retrieval process. Similarly, the antenna pattern smears out*



*atmospheric features especially at low deviations from the horizontal in a vertically stratified atmosphere (Meunier et al., 2013). To appreciate this laboratory measurements and their impact on the measured TB further analysis is required which would fit well into section 5.*

In Crewell, 2010, the authors state that “.Because of the strong nonlinear changes in brightness temperature with frequency when atmospheric spectral features are measured the detector's exact band-pass characteristics have to be taken into account”. Our study presents exactly this transmission function, needed for the correct set-up of a retrieval algorithm. Similarly, the antenna pattern is presented in this study, and should, ideally, be used in any retrieval algorithm used to derive the atmospheric temperature profiles.

We did explicitly state that we do not discuss retrieval methods and associated uncertainties; Hence, we feel that while those are important points to consider in a retrieval set-up, a thorough discussion of these effects would go beyond the scope of this study.

*P7I12: “A certain ‘waviness’ is visible next to this” ripples are typical in any microwave component due to EM wave theory propagation – reducing the amplitude is key.*

Thank you for your comment on this observation, clarifying the source of the observed signal. Since the structure is now known through the measurement of the transmission function, it can be considered in RT calculations. Attempting to reduce the amplitude would necessitate the disassembling of the instrument, and possibly replacing parts, which, as mentioned before, has serious implications for aircraft certification.

*P7I23: how stable is the noise diode, how much does it depend on temperature (stabilization)?*

There is an entire section (4.2) dedicated to this question. We have added a reference to this section. When investigating measurement flight data, it is mentioned, that on top of general noise diode signal dependence on temperature, we did experience technical problems due to a cold soldering joint in our measurement campaign, so it is not possible to make statements about the stability in real flight conditions.

*P8I14: “takes some time to stabilize”.. needs to be more quantitative – later it is mentioned but not here*

Actually, quantification is hard due to the fact that this stabilization depends a lot on the environment, and the way the instrument is operated. We did observe quite different times the instrument took to stabilise – between different operating environments. We have added a sentence in the revised text to acknowledge this fact.

*Section 3.2: Information on the accuracy of the target temperatures is missing. P9I14 mentions the “hot” target – should be explained before*

The reference “hot target” is introduced at the beginning of Section 3.2, in the paragraph that describes the laboratory settings, and which targets are used. (p.8, I21 in the discussion paper).

The heating of the target is done in the same way as the heating of other parts of the instrument (see Mahoney and Denning, 2009). The thermistors are heating the components to within an accuracy of +/- 0.1C (private communication with Mahoney and Denning)

The temperature actually seen in the calibration process is investigated in Section 4.2. Figure 10 shows a constant reading of the “target temperature” from the MTP housekeeping data throughout the entire measurement series in the cold-chamber. There is no other measurement of the target temperature available, and external monitoring, e.g. through an infrared camera, cannot be realised in flight, due to the aircraft certification process. (See also our answer to your comment referring to p4/l29).

*P8l30: I find the term “at all LOs” confusing – also at other instances. Why not write for all frequency channels?*

Given that the use of “LO” might be misleading to some readers, we gladly follow this suggestion, to rather use the wording “all frequency channels”.

*P9l7: Why do the authors not use the classical microwave notation using the gain (cf, Janzen, Mc Grawth and Hewison, ? The difference between receiver and system noise temperature needs to be made clear.*

We chose this approach based on the investigation of “how to best calculate the brightness temperature from a known recorded signal (counts)”, i.e. looking for a way to calculate the brightness temperature as a function of the recorded counts, contrary to the traditional approach taken in microwave radiometry. However, this approach is still similar in the way that the defined slope of the line (“S\_cal”) in this study, is the inverse of the traditional definition of the Gain, while the receiver noise temperature is still defined in the same way, as in the classical formulation of microwave radiometry.

Since the classical notation is much better known, the authors do acknowledge this fact, by adding a note in the revised manuscript.

*P9l17: Radiometers are never completely stable which is why periodic calibrations have to be made. In between this calibrations the TB could be corrected assuming a linear trend as shown in Fig. 6. The following paragraph describes this for the airborne measurements bit it is unclear for me that for these linear fits segments of 5 min without calibration are used?*

The 5 minutes mentioned in the following paragraph do not refer to the time between two calibration measurements, but to the length of the flight segment from which data is being used. Calibration measurements during flight are part of every single measurement cycle (i.e. one calibration measurement every 13-14 seconds!). We have added this information in the revised manuscript.

*P10l1 and following: The spectral analysis is interesting and similar to the Allan variance but is unclear to me why it is applied to atmospheric measurements and not to the cold chamber measurements where the real instrument performance could be tested. The concatenation eliminates real temporal signals. Does the analysis differ between in flight and laboratory measurements .*

We used the flight segments, because some of those are much longer than the cold-chamber measurement segments. When comparing the analysis from the flight segments to drift measurements in the laboratory, the results do look similar, as long as the drift period is included. If it is not included, the result from the drift measurements indicate a smaller correlation coefficient alpha, showing that without drift, the instrument noise behaves more like white noise.

Using the campaign measurements has the advantage, that the parameters used to test significance in the data analysis represent much more conservative limitations, so that the confidence in the results is higher.

*P10I20-27: "line parameters" is irritating as it could be interpreted in spectral lines: it is about the updating your calibration model, basically, gain and receiver noise temperature. It looks like the authors are not too familiar with typical microwave calibration techniques which is reflected by the lack of citation of microwave radiometer basics and studies. In operational receivers many strategies for that exist (Maschwitz et al., 2013) as typically gain needs to be adjusted more frequently than TR, relative/absolute calibration.*

In the revised version we only use the term "calibration parameters". As mentioned in some answers above, the calibration measurements are performed as frequently as possible during deployments.

*P11IEquation: Why so complicated  $T_r^{CCh}(C_{hot})$  and not simply  $T_r$  – explain the meaning of the different indices.*

$T_r^{CCh}$  is derived using different measurements than  $T_r^{ND}$ , since they are calculated using different calibration methods, which is shown by using the indices. It is now explained in the text.

*P11I19: Give values to underline the statement*

This comment refers to the statement that when applying the calibration method that is based on the hot target and the noise diode "[...] two reference temperatures are used, which are above the expected measurement range.

As suggested by Reviewer two, we have added a sentence in the beginning of the document, that the atmospheric temperatures surrounding the aircraft (and therefore measured by the MTP), are within a range of 190K - 260K in flight. Higher temperatures – up to 300 K are also possible at very low flight levels. As explained in the instrument description, the hot target has a temperature control keeping its back side at a temperature of 45C (just below 320K), and the noise diode signal is added to this temperature, which is mentioned in this very paragraph. Hence, with the addition of expected atmospheric temperatures, it should now be clear that both temperatures used for calibration are (well) above the expected atmospheric temperatures measured by the MTP. A sentence is added in the revised text, to underline the statement.

*P12I4: The calibration strategies might serve different purposes. That the first strategy leads to comparable results seems astonishing.*

Finding that laboratory values can be used to calibrate flight data is, indeed, astonishing. However, the laboratory data we refer to were produced in very specific conditions, meant to imitate flight conditions. Those results cannot be achieved by a single calibration on the ground, since the trends in changing calibration parameters cannot be reproduced without the specific settings used in our laboratory set-up. It was the purpose of those specific settings to mimic flight conditions as well as possible, and the results show that of all changing parameters, that can influence the instrument during flight, the temperature has the most important influence. This is in agreement with the finding of McGrath and Hewison, 2001, who also found the largest dependence of instrument parameters on temperature changes.

*P12I12: The cause for the standing waves is the refractive index of the LN2 – here KÜchler et al., 2016 should be cited for details. Here it sounds that just the evaporation is the reason*  
We have revised the sentence, so that it now should be clear that the *\_changing\_* interference with the standing wave is caused by the evaporation of the liquid nitrogen. A reference to Section 4.1.1 in KÜchler et al., 2016 has also been added, since it gives useful background to the standing wave problem.

*P12I25: Of course the calibration parameters change with changing environmental conditions if the temperature stabilization of the instrument is not perfect. The question to ask is if this is repeatable. Would the same parameters be measured if the instrument had been moved and electrically disconnected in between?*

Single calibration measurements, using the hot-cold method were performed before and after a number of campaign deployments, but did not show any consistent picture, due to the large influence of the surrounding temperatures on the MTP instrument. These surroundings cannot be influenced while the MTP is mounted on the aircraft, hence, it is not easy to repeat the measurements needed to establish this consistence. However, all calibration parameters derived during those hot-cold calibration during campaigns were within the range of observed calibration parameters during the cold-chamber measurement series, which is a strong indication that un-mounting the instrument and installing it in the cold-chamber did not have significant impact on the parameters. This is a very strong indication that repeatability is given between different MTP campaign deployments.

*P13I29: Why is the temperature unknown – more discussion is needed – see Mc Grawth and Hewison, 2001.*

We have mentioned the temperature gradient between the back of the target (which is heated), and the (not heated) front of the absorber, to which the measurement is most sensitive to. We have re-worded the paragraph, so that this fact becomes clearer.

*P16I8: why do you explain this only here and not at the beginning of the calibration section*  
The order of the section of uncertainty estimation has been changed accordingly in the revised manuscript.

*P16I13: Nobody remembers counts better give the atmospheric temperatures and notate the counts with  $c_{min}$  and  $c_{mac}$  or later  $c_{ref}$  instead of 18500.*

The notation follows the calculation. For better understandability, we have added the corresponding temperatures.

*P16I24: “The vertical, grey shaded..” this is not paper style. The figure should be only a reference for the text.*

We have moved the descriptive part of the text to the figure caption.

*P17I9: “In literature” then give a reference*

The reference to Ulaby, Moore, and Fung, 1981, and Woodhouse, 2005 were already given after the equation was stated. We have moved this reference to the beginning of the sentence.

*P17I9 to 29: This paragraph shows that the authors have not much experience with microwave radiometry. It is weird to present the well established radiometer formula at the end and not in the beginning. The formula describes the internal noise of an ideal radiometer and typically one just writes a proportionality and not an equal sign as other losses occur (e.g. factor 2 for Dicke switching). Further, the authors put in 400 MHz as bandwidth but the double sideband receiver only has 200 MHz in the IF. The most important think to look at the*

*radiometer formula is to check if the noise decreases with longer integration time which is basically what the Allan Variance technique does – it finds out at which point gain fluctuations dominate. This should be checked by the laboratory measurements in the beginning and not in this section. Note, it is strange to only now to provide the integration time for atmospheric measurements.*

We have switched the order of the paragraphs, so that it now starts with the theoretical formula. It is correct, that only the 200 MHz bandwidth is to be used, which has been corrected. The new uncertainty value is 0.117 K; assuming an atmospheric temperature of 250 (0.108 K for  $T_{\text{atmo}} = 190$  K, and 0.1255 K for  $T_{\text{atmo}} = 300$  K). This is still considerably smaller than the error derived from calibration parameters, so the overall message remains true.

The integration time used for recording measurements was added in the table.

*P18114: If the dominant uncertainty is the noise couldn't it be reduced by longer integration times?*

There are two possible ways to reduce the noise: 1) to change parts of the instrument, which is not possible due to the aircraft certification. The other possibility is to increase the integration time while recording the signal. This implies a longer recording time for a single measurement cycle, which in turn reduces the horizontal resolution of the measurement, due to the high speed of the jet-engine aircraft the DLR-MTP is flown on. The current settings are recommended by the inventors of the instrument, who have already considered the best compromise between instrument noise figure and measurement resolution (private communication). We have added a sentence to remind the reader of the fact that noise reduction is only available at the expense of horizontal resolution.

*P18130: LO frequency*

“frequency” was added in the text.

*Table 1 does not include all instrument characteristics of interest, e.g. receiver noise temperatures, integration time, polarization. I am missing information on microwave window transmission*

The table has been updated.

*Fig. 8 could be combined with Fig. 10*

We have combined the two figures in the revised version.

*Fig 11: Different calibrations need to be explained in figure caption. Caption does not say how the difference is calculated (what is the reference – the overall mean?). As I do not see significant temporal development mean and standard deviation could be just added as last lines in Table 6.*

The reference of the shown brightness temperature difference is the time series of brightness temperatures derived with method TTS1. We have updated the figure caption to include a reference to Table 6, which explains the calibration methods.
